# Supplementary material for: Online Mental Health Survey for Addressing Psychosocial Conditions During the COVID-19 Pandemic in Indonesia: Instrument Evaluation
Source: Research Square preprint supplement (doi:10.21203/rs.3.rs-140796/v1), 2021-01-08
Supplement: Supplementary file 1 [file ffed9e6d7511d8c5788051fa.docx]

In the last 30 days

**SRQ-20**

1. Do you Often have headaches? Yes/no
2. Is your appetite poor ? Yes/no
3. Do yo sleep badly? Yes/no
4. Are you easily frightened? Yes/no
5. Do your hands shake? Yes/no
6. Do you feel nervous, tense or worried ? Yes/no
7. Is your digestion poor? Yes/no
8. Do you have trouble thinking clearly? Yes/no
9. Do you feel unhappy? Yes/no
10. Do you cry more than usual? Yes/no
11. Do you find it difficult to enjoy your daily activities? Yes/no
12. Do you find it difficult to make decisions? Yes/no
13. Is your daily work suffering? Yes/no
14. Are you unable to play a useful part in life? Yes/no
15. Have you list interest in things? Yes/no
16. Do you feel that you are a worthless person? Yes/no
17. Has the thought of ending your life been in your mind? Yes/no
18. Do you feel tired all the time? Yes/no
19. Do you have uncomfortable feelings in your stomach? Yes/no
20. Are you easily tired? Yes/no

**PTSD (5 Items)**

1. Are you have dream that disturbing your sleep moment about disaster or traumatic event or have you ever been feeling re-experiencing symptoms? Yes/no
2. Are you staying away from event, place, people, or thought which associate to memory of the trauma ? Yes/no
3. Are you feeling loss of interest to friends or event you used to do in the past? Yes/no
4. Are you feeling uncomfortable if you are being in situation which make you remember or if you remind about the disaster or traumatic event? Yes/no
5. Are you feeling hard to express and understand your emotion? Yes/no

**CESD-10 :**

Answers:

1: Rarely or never (less than 1 day)

2: Sometime (1-2 days)

3: Often (3-4 days)

4: Always (5-7 days)

Questions:

During this week

1. I feel annoyed by things that used to be normal for me

2. I find it difficult to focus on what I am doing

3. I feel depressed

4. Everything I do is harder to do

5. I feel hopeful about my future

6. I was overcome with fear

7. My sleep is restless

8. I feel happy

9. I feel "alone"

10. I find it hard to start something
